# Supplementary material
Source: PubMed Central journal article supplement (PMC1913746)
Supplement: plntcell_tpc.105.040675_1.pdf [file plntcell_tpc.105.040675_1.pdf]

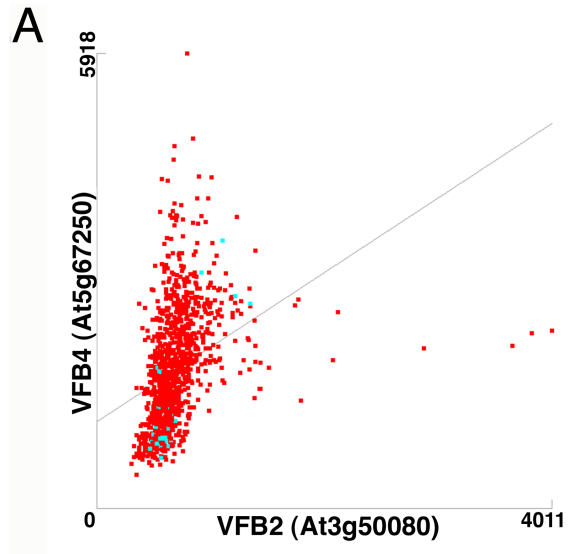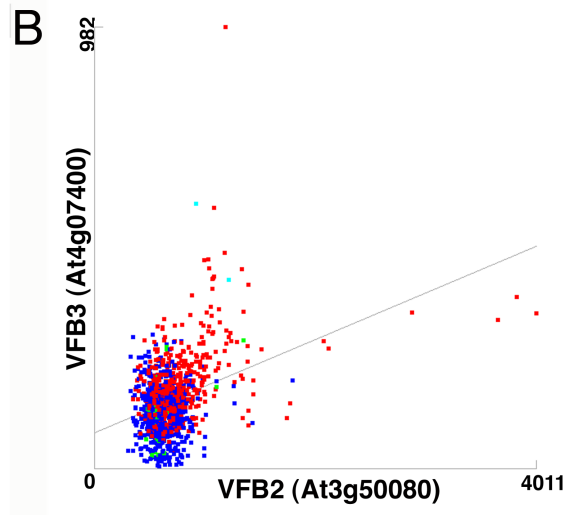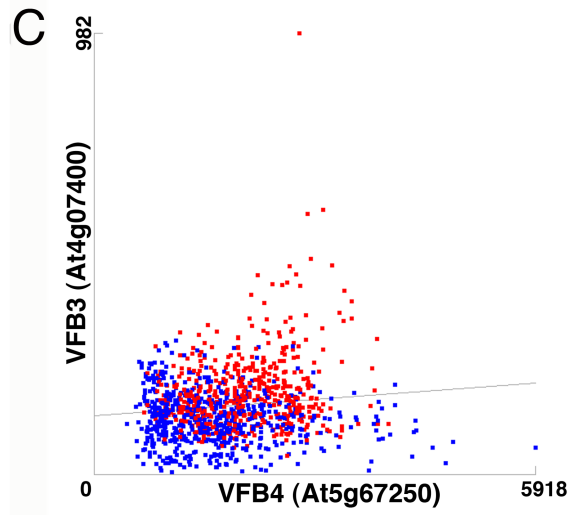

**Supplemental Figure 1:** Analysis of published *VFB* gene expression data (1021 microarray data sets of AtGenExpress). **A.** *VFB2* and *VFB4* are expressed under any condition examined and both genes show strongly correlated gene expression changes. In turn, *VFB3* expression is not well correlated with the expression of *VFB2* (**B**) and *VFB4* (**C**). *VFB1* could not be included in this analysis since it is not represented on the Affymetrix ATH1 GeneChip. The graphs are in linear scale and values indicate maximum raw data values. Red squares, both genes are expressed above threshold; dark blue squares, the Y-axis gene is expressed below threshold, light blue squares, the X-axis gene is expressed below threshold.
