# Supplementary material
Source: PubMed Central journal article supplement (PMC1913746)
Supplement: plntcell_tpc.105.040675_7.pdf [file plntcell_tpc.105.040675_7.pdf]

| Fold Induction | Gene Identity | Description                                                        | adjPVal     | B statistic | Odds of differential expression: wild type (min to max) | vfb mutant (min to max) |                        |
|----------------|---------------|--------------------------------------------------------------------|-------------|-------------|---------------------------------------------------------|-------------------------|------------------------|
| 10,43          | AT4G32280     | auxin-responsive AUX/IAA family protein                            | 2.62e-06    | 11,42       | 100,00%                                                 | 94,76 (54,55 to 130,2)  | 8,632 (7,184 to 10,23) |
| 7,26           | AT5G62280     | expressed protein                                                  | 6.25e-07    | 13,88       | 100,00%                                                 | 234,2 (185,9 to 284,9)  | 31,76 (31,42 to 31,93) |
| 6,47           | AT2G42870     | expressed protein                                                  | 1.33e-06    | 12,66       | 100,00%                                                 | 151 (128,7 to 174)      | 23,73 (17,28 to 29,45) |
| 4,66           | AT5G57760     | expressed protein                                                  | 1.33e-06    | 12,69       | 100,00%                                                 | 61,4 (59,79 to 62,37)   | 13,41 (10,11 to 15,98) |
| 4,64           | AT3G04210     | disease resistance protein (TIR-NBS class), putative               | 3.48719e-04 | 3,84        | 97,90%                                                  | 271,4 (204,1 to 376,1)  | 57,06 (46,12 to 64,41) |
| 4,35           | AT5G18060     | auxin-responsive protein, putative                                 | 1.59213e-04 | 4,98        | 99,32%                                                  | 150,7 (122,9 to 205,8)  | 33,61 (32 to 34,59)    |
| 4,28           | AT5G02760     | protein phosphatase 2C family protein / PP2C family protein        | 1.55e-06    | 12,24       | 100,00%                                                 | 447,7 (288,1 to 549,5)  | 102,2 (79,51 to 119,7) |
| 3,88           | AT3G59350     | serine/threonine protein kinase, putative                          | 3.66789e-04 | 3,77        | 97,75%                                                  | 469,9 (390 to 549,4)    | 121,9 (100,7 to 152,6) |
| 3,81           | AT1G79700     | ovule development protein, putative                                | 1.66454e-04 | 4,89        | 99,25%                                                  | 155,8 (130,1 to 187)    | 43,18 (24,12 to 59,28) |
| 3,76           | AT3G21550     | expressed protein                                                  | 8.25e-05    | 5,99        | 99,75%                                                  | 74,79 (67,68 to 83,85)  | 20,84 (12,31 to 25,73) |
| 3,51           | AT1G28330     | dormancy-associated protein, putative (DRM1)                       | 3.35288e-04 | 3,91        | 98,04%                                                  | 1.277 (1.225 to 1.336)  | 391,3 (224,6 to 580,3) |
| 3,35           | AT1G78970     | lupeol synthase (LUP1) / 2,3-oxidosqualene-triterpenoid cyclase    | 8.19e-05    | 6,01        | 99,76%                                                  | 181,3 (167 to 195,4)    | 54,26 (50,05 to 60,57) |
| 3,29           | AT2G34770     | fatty acid hydroxylase (FAH1)                                      | 1.06901e-04 | 5,61        | 99,64%                                                  | 714,2 (654,9 to 811,2)  | 219,9 (174,8 to 275)   |
| 3,28           | AT2G33570     | expressed protein                                                  | 2.3e-05     | 7,9         | 99,96%                                                  | 216,6 (202,7 to 226,6)  | 66,1 (58,9 to 71,55)   |
| 3,27           | AT3G15540     | auxin-responsive protein / indoleacetic acid-induced protein 19 (I | 3.08e-05    | 7,48        | 99,94%                                                  | 109,2 (103,3 to 115,9)  | 33,6 (27,75 to 37,8)   |
| 3,26           | AT4G34770     | auxin-responsive family protein                                    | 1.65e-06    | 12,14       | 100,00%                                                 | 65,48 (56,96 to 77,05)  | 20,46 (15,62 to 26,81) |
| 3,15           | AT3G58120     | bZIP transcription factor family protein                           | 3.01686e-04 | 4,07        | 98,32%                                                  | 427,4 (391 to 446)      | 139,5 (99,5 to 180,7)  |
| 3,11           | AT5G37990     | S-adenosyl-L-methionine                                            | 1.51238e-04 | 5,06        | 99,37%                                                  | 313,6 (262,5 to 358,6)  | 100,4 (92,58 to 114,8) |
| 2,97           | AT1G04240     | auxin-responsive protein / indoleacetic acid-induced protein 3 (IA | 2.1e-05     | 8,07        | 99,97%                                                  | 198,6 (171,9 to 243,3)  | 66,2 (63,8 to 68,37)   |
| 2,92           | AT1G43790     | expressed protein                                                  | 1.60411e-04 | 4,96        | 99,30%                                                  | 170 (136 to 203,3)      | 57,65 (51,53 to 62,64) |
| 2,87           | AT5G47370     | homeobox-leucine zipper protein 2 (HAT2) / HD-ZIP protein 2        | 1.33e-06    | 12,58       | 100,00%                                                 | 237,9 (187,9 to 273,2)  | 82,06 (74,25 to 86,45) |
| 2,86           | AT1G64360     | expressed protein                                                  | 7.09e-05    | 6,25        | 99,81%                                                  | 103,3 (84,34 to 122,1)  | 36,18 (28,5 to 43)     |
| 2,83           | AT1G03870     | fasciclin-like arabinogalactan-protein (FLA9)                      | 4.92e-05    | 6,85        | 99,89%                                                  | 1.494 (1.433 to 1.615)  | 536 (415,9 to 641,6)   |
| 2,81           | AT4G35320     | expressed protein                                                  | 2.00253e-04 | 4,65        | 99,05%                                                  | 58,38 (51,32 to 66,12)  | 20,9 (17,62 to 25,48)  |
| 2,71           | AT3G03840     | auxin-responsive protein, putative                                 | 5.75141e-04 | 3,06        | 95,52%                                                  | 37,43 (32,37 to 43,88)  | 14,02 (10,18 to 17,41) |
| 2,66           | AT5G03260     | laccase, putative / diphenol oxidase, putative                     | 1.63125e-04 | 4,92        | 99,28%                                                  | 32,17 (28,33 to 38,73)  | 12,13 (10,68 to 14,85) |
| 2,65           | AT1G64640     | plastocyanin-like domain-containing protein                        | 9.27e-06    | 9,49        | 99,99%                                                  | 142,9 (131,7 to 159,1)  | 54,69 (41,86 to 63,17) |
| 2,63           | AT1G29430     | auxin-responsive family protein                                    | 4.65316e-04 | 3,41        | 96,80%                                                  | 212,1 (156,8 to 292)    | 78,34 (70,26 to 88,68) |
| 2,60           | AT4G35350     | cysteine endopeptidase, papain-type (XCP1)                         | 2.77381e-04 | 4,18        | 98,49%                                                  | 158,4 (138,6 to 177,5)  | 60,78 (54,1 to 64,97)  |
| 2,55           | AT1G19530     | expressed protein                                                  | 3.63e-08    | 18,02       | 100,00%                                                 | 41,97 (31,34 to 53,04)  | 16,11 (15,5 to 16,44)  |
| 2,52           | AT1G02640     | glycosyl hydrolase family 3 protein                                | 7.34e-06    | 9,88        | 99,99%                                                  | 269,6 (250,4 to 289,7)  | 109,4 (78,45 to 127,9) |
| 2,49           | AT2G42530     | cold-responsive protein / cold-regulated protein (cor15b)          | 4.94e-05    | 6,83        | 99,89%                                                  | 802,6 (705 to 924,7)    | 332,1 (225,5 to 432,6) |
| 2,48           | AT4G03190     | F-box family protein (FBL18)                                       | 4.58e-05    | 6,95        | 99,90%                                                  | 247,2 (219,1 to 280,2)  | 99,22 (94,58 to 107,2) |
| 2,48           | AT3G63440     | FAD-binding domain-containing protein / cytokinin oxidase family   | 9.27e-06    | 9,47        | 99,99%                                                  | 38,85 (33,89 to 42,3)   | 15,62 (15,1 to 16,36)  |
| 2,47           | AT1G14920     | gibberellin response modulator (GAI) (RGA2) / gibberellin-respon   | 3.20353e-04 | 3,97        | 98,15%                                                  | 432,5 (366,1 to 488,6)  | 176,4 (141,2 to 210,5) |
| 2,45           | AT3G01670     | expressed protein                                                  | 3.93251e-04 | 3,64        | 97,44%                                                  | 142,9 (130 to 154,8)    | 58,48 (51,01 to 65,5)  |
| 2,44           | AT5G48900     | pectate lyase family protein                                       | 4.83028e-04 | 3,35        | 96,61%                                                  | 281,9 (244,2 to 301,3)  | 115,4 (102,7 to 125,4) |
| 2,44           | AT3G23030     | auxin-responsive protein / indoleacetic acid-induced protein 2 (IA | 3.01e-05    | 7,51        | 99,95%                                                  | 1.109 (1.015 to 1.264)  | 454 (414,2 to 490,5)   |
| 2,43           | AT5G15160     | bHLH family protein                                                | 1.1354e-04  | 5,5         | 99,59%                                                  | 106 (87,3 to 121,4)     | 43,22 (40,07 to 46,33) |
| 2,40           | AT5G15580     | expressed protein                                                  | 2.37355e-04 | 4,4         | 98,79%                                                  | 164,6 (139,4 to 179,7)  | 68,62 (60,23 to 78,22) |
| 2,36           | AT1G29500     | auxin-responsive protein, putative                                 | 5.23e-05    | 6,75        | 99,88%                                                  | 165,1 (146,7 to 201)    | 69,71 (59,58 to 76,61) |
| 2,34           | AT4G16515     | expressed protein                                                  | 5.94e-05    | 6,54        | 99,86%                                                  | 175,7 (166,7 to 190,8)  | 78,1 (50,77 to 101,5)  |
| 2,32           | AT4G25260     | basic helix-loop-helix (bHLH) family protein                       | 6.57e-05    | 6,38        | 99,83%                                                  | 142,8 (136 to 151,7)    | 61,67 (57,18 to 67,49) |
| 2,32           | AT1G29440     | auxin-responsive family protein                                    | 2.71175e-04 | 4,21        | 98,54%                                                  | 91,05 (63,75 to 118,8)  | 38,24 (34,9 to 43,61)  |
| 2,32           | AT2G06850     | xyloglucan                                                         | 1.06e-05    | 9,21        | 99,99%                                                  | 4.020 (3.945 to 4.058)  | 1.743 (1.588 to 1.986) |
| 2,25           | AT4G30410     | expressed protein                                                  | 2.00453e-04 | 4,65        | 99,05%                                                  | 152,2 (149,9 to 154,5)  | 67,67 (64,57 to 72,39) |
| 2,25           | AT3G57795     | auxin-responsive protein / indoleacetic acid-induced protein 6 (IA | 1.16859e-04 | 5,45        | 99,57%                                                  | 21,39 (20,44 to 21,96)  | 9,579 (7,938 to 10,45) |

|      |           |                                                                    |             |       |         |                        |                        |
|------|-----------|--------------------------------------------------------------------|-------------|-------|---------|------------------------|------------------------|
| 2,23 | AT4G14560 | auxin-responsive protein / indoleacetic acid-induced protein 1 (IA | 1.67e-05    | 8,47  | 99,98%  | 73,78 (62,95 to 83,6)  | 32,93 (31,08 to 34,74) |
| 2,22 | AT2G35880 | expressed protein                                                  | 1.2594e-04  | 5,32  | 99,51%  | 321,9 (291,1 to 350,7) | 144,7 (137,5 to 155,6) |
| 2,22 | AT1G52190 | proton-dependent oligopeptide transport (POT) family protein       | 1.49136e-04 | 5,08  | 99,38%  | 553,3 (502,7 to 596,7) | 249,9 (224,8 to 284,2) |
| 2,21 | AT5G44260 | zinc finger (CCH-type) family protein                              | 6.25e-07    | 14,28 | 100,00% | 59,25 (58,37 to 60,92) | 27,52 (22,25 to 37,11) |
| 2,19 | AT5G19530 | spermine/spermidine synthase family protein                        | 2.17015e-04 | 4,53  | 98,93%  | 175,3 (166,5 to 185,6) | 80,03 (72,24 to 86,25) |
| 2,19 | AT2G15680 | calmodulin-related protein, putative                               | 3.52502e-04 | 3,82  | 97,85%  | 84,49 (75,79 to 92,1)  | 38,53 (37,01 to 40,69) |
| 2,14 | AT1G06850 | bZIP transcription factor, putative                                | 1.18e-05    | 9,06  | 99,99%  | 36,64 (31,13 to 41,54) | 17,05 (15,62 to 19,39) |
| 2,14 | AT1G14290 | acid phosphatase, putative                                         | 4.45e-06    | 10,83 | 100,00% | 185,8 (179,6 to 194,5) | 86,72 (83,5 to 89,27)  |
| 2,14 | AT5G22500 | acyl CoA reductase, putative / male-sterility protein, putative    | 8.6e-05     | 5,94  | 99,74%  | 152 (145,5 to 162,1)   | 71,27 (64,88 to 80,22) |
| 2,12 | AT3G13980 | expressed protein                                                  | 5.27677e-04 | 3,21  | 96,12%  | 81,51 (74,83 to 88,72) | 38,32 (38,06 to 38,68) |
| 2,11 | AT1G11545 | xyloglucan                                                         | 9.27e-06    | 9,48  | 99,99%  | 137,3 (116 to 157,7)   | 64,62 (61,89 to 69,93) |
| 2,11 | AT3G20570 | pathogenesis-related protein, putative                             | 2.15588e-04 | 4,54  | 98,94%  | 56,34 (46,31 to 73,78) | 26,36 (22,48 to 30,26) |
| 2,08 | AT2G17880 | DNAJ heat shock protein, putative                                  | 2.25608e-04 | 4,48  | 98,88%  | 106,6 (94,01 to 131,6) | 51,79 (36,62 to 61,91) |
| 2,08 | AT1G15580 | auxin-responsive protein / indoleacetic acid-induced protein 5 (IA | 2.43e-05    | 7,81  | 99,96%  | 16,79 (13,13 to 20,2)  | 7,967 (7,582 to 8,677) |
| 2,06 | AT4G34760 | auxin-responsive family protein                                    | 2.3e-05     | 7,9   | 99,96%  | 335,1 (310,8 to 352,2) | 162,4 (151 to 170,3)   |
| 2,05 | AT1G14280 | phytochrome kinase, putative                                       | 3.36059e-04 | 3,9   | 98,02%  | 585,2 (552 to 628,2)   | 285,2 (268,8 to 307,1) |
| 2,03 | AT3G62660 | glycosyl transferase family 8 protein                              | 1.48006e-04 | 5,09  | 99,39%  | 183,1 (170,3 to 198,1) | 92,14 (71,46 to 119,9) |
| 2,00 | AT4G09890 | expressed protein                                                  | 1.73657e-04 | 4,83  | 99,21%  | 162,6 (144,1 to 193)   | 81,08 (74,82 to 93,11) |
| 1,98 | AT1G75500 | nodulin MtN21 family protein                                       | 3.02456e-04 | 4,06  | 98,30%  | 596,2 (571,1 to 627,7) | 301,5 (272,2 to 328,6) |
| 1,98 | AT5G02540 | short-chain dehydrogenase/reductase (SDR) family protein           | 6.25e-07    | 14,32 | 100,00% | 59,55 (45,4 to 71,69)  | 29,67 (26,96 to 32,1)  |
| 1,96 | AT2G42040 | expressed protein                                                  | 4.62333e-04 | 3,42  | 96,83%  | 144,8 (115,8 to 175,9) | 72,99 (65,89 to 78,11) |
| 1,92 | AT2G47930 | hydroxyproline-rich glycoprotein family protein                    | 9.43e-05    | 5,79  | 99,70%  | 154,7 (139,7 to 167)   | 81,12 (71,79 to 98,24) |
| 1,90 | AT1G12080 | expressed protein                                                  | 8.09e-06    | 9,76  | 99,99%  | 94,52 (85,73 to 101,5) | 50 (45,05 to 58,91)    |
| 1,90 | AT2G01420 | auxin transport protein, putative                                  | 4.77277e-04 | 3,37  | 96,68%  | 304,1 (292,4 to 318,9) | 160,4 (151 to 176,4)   |
| 1,89 | AT2G33990 | calmodulin-binding family protein                                  | 5.69614e-04 | 3,07  | 95,56%  | 104,3 (96,73 to 110,2) | 55,51 (47,27 to 65,09) |
| 1,88 | AT3G15630 | expressed protein                                                  | 4.78166e-04 | 3,37  | 96,68%  | 784,3 (662,9 to 982)   | 423,9 (286,2 to 498,9) |
| 1,86 | AT4G30650 | hydrophobic protein, putative / low temperature and salt responsi  | 3.06482e-04 | 4,04  | 98,27%  | 1.911 (1.610 to 2.322) | 1.032 (787,3 to 1.210) |
| 1,85 | AT2G14900 | gibberellin-regulated family protein                               | 2.43e-05    | 7,81  | 99,96%  | 290 (286 to 293,6)     | 156,8 (148,3 to 164,8) |
| 1,85 | AT1G70940 | auxin transport protein, putative (PIN3)                           | 3.90964e-04 | 3,64  | 97,44%  | 269 (247,5 to 305,5)   | 145,4 (129,1 to 164,9) |
| 1,85 | AT4G01330 | protein kinase family protein                                      | 8.09e-06    | 9,75  | 99,99%  | 243 (233,4 to 259,9)   | 131,6 (120,8 to 144,8) |
| 1,85 | AT1G74740 | calcium-dependent protein kinase, putative / CDPK, putative        | 4.4085e-04  | 3,49  | 97,04%  | 52,19 (42,8 to 60,86)  | 28,09 (24,89 to 31,33) |
| 1,85 | AT2G15320 | leucine-rich repeat family protein                                 | 3.88337e-04 | 3,65  | 97,47%  | 56,32 (53,61 to 60,81) | 30,65 (26,37 to 34,39) |
| 1,84 | AT1G79660 | expressed protein                                                  | 5.92267e-04 | 3,01  | 95,30%  | 190,2 (164 to 237,1)   | 101,9 (96,89 to 104,7) |
| 1,83 | AT2G21050 | multi-copper oxidase type I family protein                         | 2.1e-05     | 8,07  | 99,97%  | 180,2 (150,9 to 201,7) | 98,84 (82,08 to 117)   |
| 1,83 | AT5G66920 | amino acid permease, putative                                      | 7.72e-05    | 6,11  | 99,78%  | 111,6 (107,2 to 117,9) | 61,08 (56,28 to 64,78) |
| 1,81 | AT3G60260 | phagocytosis and cell motility protein ELMO1-related               | 4.90494e-04 | 3,32  | 96,51%  | 122,1 (109,3 to 136,7) | 67,51 (60,21 to 78,57) |
| 1,80 | AT1G23080 | auxin efflux carrier protein, putative                             | 8.19e-05    | 6,02  | 99,76%  | 189,8 (169,3 to 202,2) | 107,5 (87,13 to 141,9) |
| 1,72 | AT1G36940 | hypothetical protein                                               | 6.25e-07    | 13,95 | 100,00% | 22,29 (19,53 to 24,47) | 12,94 (11,6 to 14,53)  |
| 1,72 | AT3G49220 | pectinesterase family protein                                      | 2.0067e-04  | 4,64  | 99,04%  | 535,5 (501,7 to 596)   | 310,7 (296,8 to 329,1) |
| 1,69 | AT3G23690 | wound-responsive protein-related                                   | 4.96017e-04 | 3,31  | 96,48%  | 764,5 (732,7 to 784,3) | 452,8 (415,9 to 475,4) |
| 1,68 | AT5G19770 | tubulin alpha-3/alpha-5 chain (TUA3)                               | 4.8829e-04  | 3,33  | 96,54%  | 2.655 (2.497 to 2.779) | 1.585 (1.414 to 1.763) |
| 1,68 | AT5G66080 | zinc finger (GATA type) family protein                             | 3.38734e-04 | 3,88  | 97,98%  | 19,95 (18,55 to 22,11) | 12,2 (9,528 to 16,45)  |
| 1,67 | AT5G54510 | auxin-responsive GH3 protein, putative (DFL-1)                     | 2.02999e-04 | 4,63  | 99,03%  | 476,4 (421,8 to 506)   | 288,8 (216,6 to 341,1) |
| 1,67 | AT1G80280 | 26.5 kDa class P-related heat shock protein (HSP26.5-P)            | 1.89723e-04 | 4,72  | 99,12%  | 615,2 (523,9 to 726,1) | 366,1 (340,3 to 410,7) |
| 1,67 | AT2G46780 | hydrolase, alpha/beta fold family protein                          | 1.50209e-04 | 5,07  | 99,38%  | 107,1 (72,49 to 139,9) | 62,3 (52,53 to 69,17)  |
| 1,67 | AT4G21870 | RNA recognition motif (RRM)-containing protein                     | 1.22189e-04 | 5,37  | 99,54%  | 20,63 (18,28 to 22,01) | 12,31 (11,82 to 12,88) |
| 1,67 | AT1G07050 | CONSTANS-like protein-related                                      | 2.23e-05    | 7,94  | 99,96%  | 180,7 (150,5 to 210,1) | 107,4 (107,2 to 107,7) |
| 1,67 | AT1G34760 | 14-3-3 protein GF14 omicron (GRF11)                                | 3.85588e-04 | 3,67  | 97,52%  | 29,36 (26,45 to 31,22) | 17,68 (15,29 to 19,69) |

|      |           |                                                                      |                    |             |               |                        |                        |
|------|-----------|----------------------------------------------------------------------|--------------------|-------------|---------------|------------------------|------------------------|
| 1,65 | AT1G01620 | plasma membrane intrinsic protein 1C (PIP1C) / aquaporin PIP1.       | 4.21348e-04        | 3,54        | 97,18%        | 1.711 (1.692 to 1.738) | 1.043 (917 to 1.154)   |
| 1,65 | AT5G52900 | expressed protein                                                    | 1.53108e-04        | 5,04        | 99,36%        | 158,3 (103,3 to 189,9) | 92,84 (91,14 to 95,79) |
| 1,64 | AT2G28080 | glycosyltransferase family protein                                   | 5.22086e-04        | 3,23        | 96,19%        | 189,7 (166,9 to 217,3) | 115,2 (114,8 to 115,5) |
| 1,63 | AT1G68810 | basic helix-loop-helix (bHLH) family protein                         | 2.62e-06           | 11,43       | 100,00%       | 45,95 (42,49 to 48,97) | 28,22 (25,82 to 29,98) |
| 1,62 | AT2G26710 | cytochrome P450, putative                                            | 5.04e-06           | 10,58       | 100,00%       | 41 (39,67 to 43,05)    | 25,97 (20,18 to 34,69) |
| 1,62 | AT1G76090 | cysteine protease inhibitor family protein / cystatin family protein | 1.99729e-04        | 4,66        | 99,06%        | 717,6 (673,4 to 781,5) | 443,1 (427 to 470,5)   |
| 1,61 | AT5G60860 | cysteine proteinase inhibitor-related                                | 4.58e-05           | 6,95        | 99,90%        | 23,1 (20,99 to 25,99)  | 14,33 (13,03 to 15,8)  |
| 1,61 | AT3G62110 | glycoside hydrolase family 28 protein / polygalacturonase (pectin    | 2.17015e-04        | 4,53        | 98,93%        | 237,3 (217,5 to 261,2) | 148,4 (125,3 to 168,3) |
| 1,60 | AT1G05250 | peroxidase, putative                                                 | 8.65e-05           | 5,92        | 99,73%        | 29,72 (24,17 to 35,86) | 18,84 (13,19 to 22,38) |
| 1,59 | AT5G39320 | UDP-glucose 6-dehydrogenase, putative                                | 7.0e-05            | 6,29        | 99,81%        | 223,8 (213,3 to 239,5) | 140,7 (129,8 to 149,5) |
| 1,58 | AT2G19460 | xyloglucan                                                           | 3.27185e-04        | 3,94        | 98,09%        | 143,1 (118,4 to 167,3) | 90,02 (82,75 to 102,7) |
| 1,58 | AT3G12710 | methyladenine glycosylase family protein                             | 1.96e-05           | 8,18        | 99,97%        | 52,07 (50,45 to 54,7)  | 33,05 (29,32 to 36,88) |
| 1,58 | AT5G21170 | 5'-AMP-activated protein kinase beta-2 subunit, putative             | 1.75812e-04        | 4,82        | 99,20%        | 485 (462,8 to 500,1)   | 324,3 (191 to 426)     |
| 1,58 | AT3G54430 | lateral root primordium (LRP) protein-related                        | 3.49345e-04        | 3,84        | 97,90%        | 49,96 (37,58 to 57,73) | 31,22 (29,76 to 33,74) |
| 1,57 | AT2G22980 | serine carboxypeptidase S10 family protein                           | 3.50878e-04        | 3,83        | 97,88%        | 739,5 (665,5 to 786,5) | 472,3 (423,3 to 545,9) |
| 1,56 | AT3G25710 | nodulin MtN21 family protein                                         | 1.13278e-04        | 5,51        | 99,60%        | 17,21 (16,55 to 17,59) | 11,2 (8,773 to 12,62)  |
| 1,56 | AT1G02340 | MADS-box family protein                                              | 1.96e-05           | 8,16        | 99,97%        | 54,28 (51,82 to 59,09) | 35,17 (29,72 to 41,39) |
| 1,55 | AT5G60850 | protein kinase, putative                                             | 1.40156e-04        | 5,16        | 99,43%        | 12,35 (10,72 to 14,24) | 8,029 (6,274 to 9,911) |
| 1,55 | AT3G10120 | phototropic-responsive NPH3 family protein                           | 3.32679e-04        | 3,92        | 98,05%        | 35,86 (33,7 to 39,28)  | 23,3 (19,05 to 27,27)  |
| 1,55 | AT5G47800 | expressed protein                                                    | 2.63824e-04        | 4,25        | 98,59%        | 109,8 (98,95 to 117,9) | 71,62 (60,28 to 89,01) |
| 1,54 | AT5G49170 | expressed protein                                                    | 3.32679e-04        | 3,92        | 98,05%        | 14,39 (11,88 to 16,49) | 9,354 (7,467 to 10,83) |
| 1,53 | AT5G64410 | oligopeptide transporter OPT family protein                          | 4.04447e-04        | 3,6         | 97,34%        | 103,9 (83,24 to 115,7) | 67,6 (61,97 to 78,35)  |
| 1,51 | AT1G06080 | delta 9 desaturase (ADS1)                                            | <b>1.4023e-04</b>  | <b>5,16</b> | <b>99,43%</b> | 83,8 (77,9 to 87,8)    | 55,8 (49,99 to 61,36)  |
| 1,50 | AT2G32450 | calcium-binding EF hand family protein                               | <b>3.79464e-04</b> | <b>3,7</b>  | <b>97,59%</b> | 62,38 (54,41 to 70,99) | 41,4 (39,45 to 43,89)  |

**Supplemental Table 4: List of genes repressed in the *vfb* mutants and in the *csn4* mutant seedlings compared to the wild type** (Odds of differential expression  $\geq 95\%$ , fold repression  $\geq 1.5$ ). Shown are the fold repression (column A); the AGI code (gene identity; column B); the gene function (Description; column C); the adjusted p-value after Benjamini and Hochberg (adjPval; column D); the B statistic, which estimates the log odds of differential expression for each gene (B statistic; column E); the odds of differential expression determined based on the B statistics (odds of differential expression; column F); raw values (min to max) of wild type (column H) and *vfb* mutant (column J) samples. Genes are ranked by fold repression.
